# Supplementary material
Source: MDPI journal article supplement (https://www.mdpi.com/2673-6497/5/2/17)
Supplement: s1 [file s1]

### Supplementary Materials

Average oxidation degree of cobalt ( $\text{Co}^{z+}$ ,  $z = 4 - x$ ) in the samples of the  $\text{Na}_x\text{CoO}_2$  layered sodium cobaltite was determined iodometrically, dissolving of weighed powder of  $\text{Na}_x\text{CoO}_2$  in the concentrated hydrochloric acid (HCl) at presents of KI potassium iodide in an inert atmosphere of nitrogen and then titrating the evolving iodine with sodium thiosulfate according to the reactions of (S1, S2)

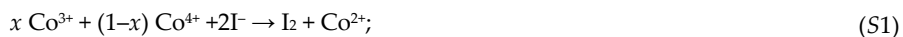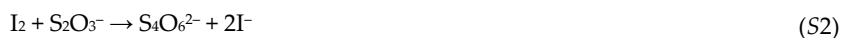

Taking into account the titration results the sodium content ( $x_{\text{Na}}$ ) in  $\text{Na}_x\text{CoO}_2$  was calculated with equation of (S3)

$$x_{\text{Na}} = (2m - 90.932CV)/(m + 22.98977CV) \quad (\text{S3})$$

where  $m$  – mass of powder of  $\text{Na}_x\text{CoO}_2$  taken for the chemical analysis, g;  $C$  – concentration of solution of  $\text{Na}_2\text{S}_2\text{O}_3$ , consumed for titration of  $\text{I}_2$ , which was formed due to the oxidation of  $\text{I}^-$  ions by  $\text{Co}^{3+}$  and  $\text{Co}^{4+}$  ions (reaction S1), mol/l;  $V$  – volume of  $\text{Na}_2\text{S}_2\text{O}_3$  solution, l.

Sodium content in the obtained ceramic materials ( $x_{\text{Na}}$ ) was also determined using results of reverse potentiometric titration, which let us to determine exact the cobalt ions content in the average oxidation degree according to the reactions of (S4, S5)

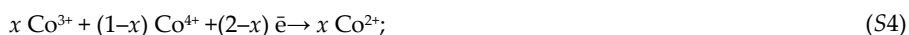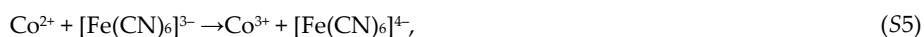

To perform the experiment, weighed powder of  $\text{Na}_x\text{Co}_{0.90}\text{M}_{0.10}\text{O}_2$  complex oxide was dissolved in the concentrated hydrochloric acid (HCl), then to the obtained solution the camouflagé citrate-ammonium buffer solution and 25%  $\text{NH}_3$  solution (to get pH = 10), as well as fixed volume of fixanale solution of  $\text{K}_3[\text{Fe}(\text{CN})_6]$  (0.05 mol/l) were added. The resulting solution was titrated by fixanale solution of  $\text{CoSO}_4$  (0.05 mol/l) by means of TitroLine easy (SI Analytics SCHOTT). On the base of titration results the sodium content ( $x_{\text{Na}}$ ) in  $\text{Na}_x\text{Co}_{0.90}\text{M}_{0.10}\text{O}_2$  was calculated using equation of (S6)

$$x_{\text{Na}} = [m/(22.98977(0.05 \cdot V_1 - 0.05 \cdot V_2))] - [M(\text{Co}_{0.90}\text{M}_{0.10}\text{O}_2)/22.98977] \quad (\text{S6})$$

where  $m$  – mass of powder of  $\text{Na}_x\text{Co}_{0.90}\text{M}_{0.10}\text{O}_2$ , g;  $V_1$  – volume of  $\text{K}_3[\text{Fe}(\text{CN})_6]$  solution, l;  $V_2$  – volume of  $\text{CoSO}_4$  solution, l.

**Table S1.** Chemical composition of ceramic samples of layered cobaltite of  $\text{Na}_{0.55}\text{CoO}_2$  and  $\text{Na}_{0.55}\text{Co}_{0.90}\text{M}_{0.10}\text{O}_2$  ( $M = \text{Cr, Ni, Zn, W}$ ) solid solution

| Состав                                                       | Элемент | keV   | mas. % | Error% |
|--------------------------------------------------------------|---------|-------|--------|--------|
| $\text{Na}_{0.55}\text{CoO}_2$                               | O-K     | 0.525 | 62.45  | 0.40   |
|                                                              | Na-K    | 1.041 | 24.86  | 0.98   |
|                                                              | Co-K    | 6.924 | 12.70  | 0.44   |
| $\text{Na}_{0.55}\text{Co}_{0.90}\text{Cr}_{0.10}\text{O}_2$ | O-K     | 0.525 | 51.80  | 0.19   |
|                                                              | Na-K    | 1.041 | 34.76  | 0.37   |
|                                                              | Co-K    | 6.924 | 11.63  | 0.19   |
|                                                              | Cr-K    | 5.411 | 1.82   | 0.12   |
| $\text{Na}_{0.55}\text{Co}_{0.90}\text{Ni}_{0.10}\text{O}_2$ | O-K     | 0.525 | 41.35  | 0.15   |
|                                                              | Na-K    | 1.041 | 22.52  | 0.37   |
|                                                              | Co-K    | 6.924 | 31.44  | 0.15   |
|                                                              | Ni-K    | 7.471 | 4.69   | 0.18   |
| $\text{Na}_{0.55}\text{Co}_{0.90}\text{Zn}_{0.10}\text{O}_2$ | O-K     | 0.525 | 38.61  | 0.16   |
|                                                              | Na-K    | 1.041 | 25.05  | 0.44   |
|                                                              | Co-K    | 6.924 | 31.53  | 0.15   |
|                                                              | Zn-K    | 8.630 | 4.82   | 0.33   |
| $\text{Na}_{0.55}\text{Co}_{0.90}\text{W}_{0.10}\text{O}_2$  | O-K     | 0.525 | 46.52  | 0.17   |
|                                                              | Na-K    | 1.041 | 17.97  | 0.30   |
|                                                              | Co-K    | 6.924 | 24.86  | 0.14   |
|                                                              | W-L     | 8.390 | 10.65  | 0.71   |
